# Supplementary figures and images for: Single-cell RNA sequencing to characterize the response of pancreatic cancer to anti-PD-1 immunotherapy
Source: PubMed Central journal article supplement — Transl Oncol. 2021 Nov 9;15(1):101262. doi: 10.1016/j.tranon.2021.101262 (PMC8591363; doi:10.1016/j.tranon.2021.101262), 2021-11-09

Full unedited gel for  
Figure 6 MHC II

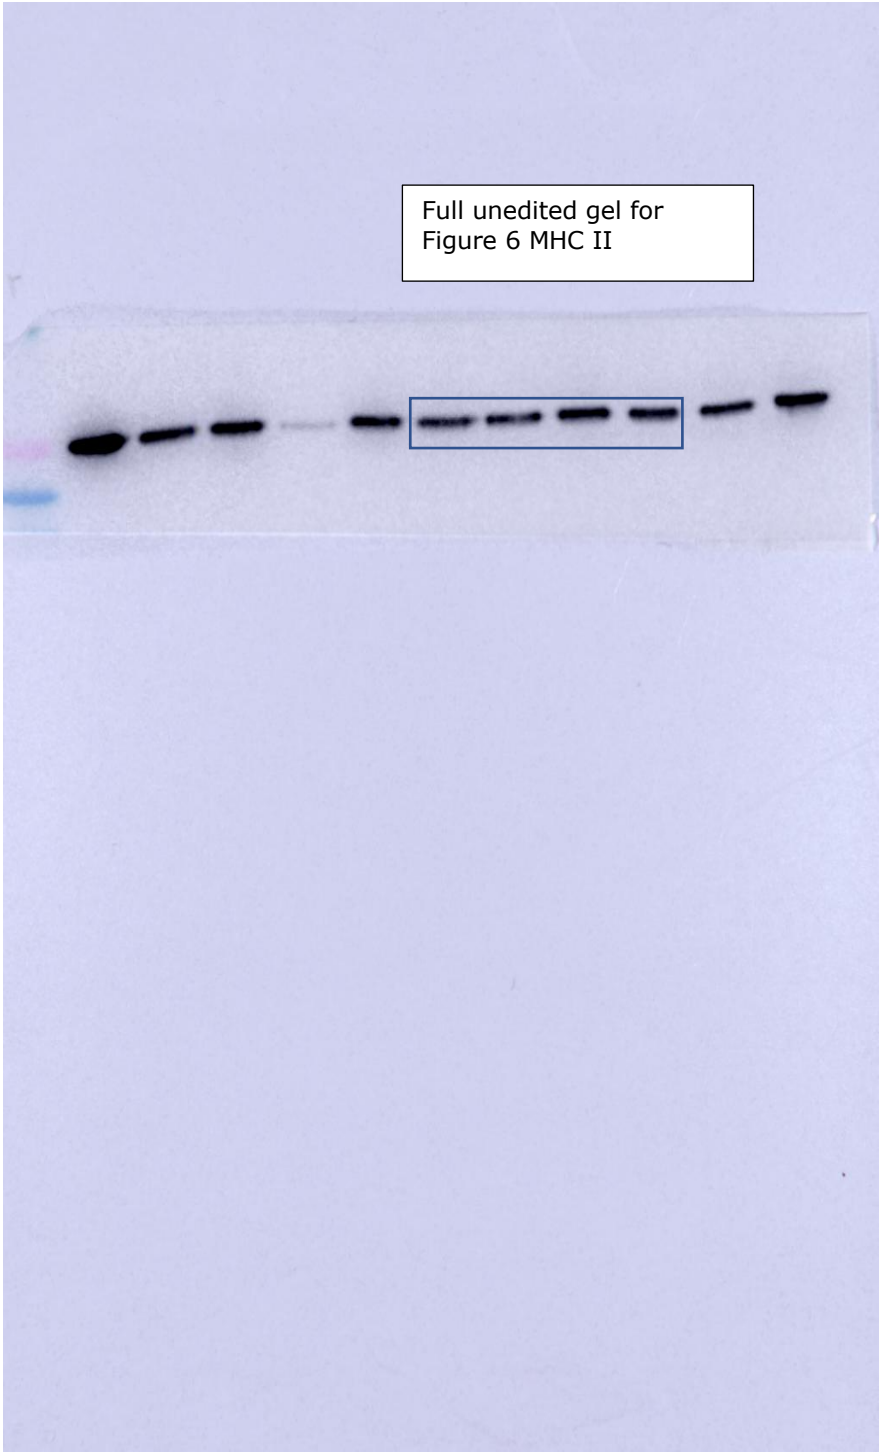

Full unedited gel for  
Figure 6 Actin

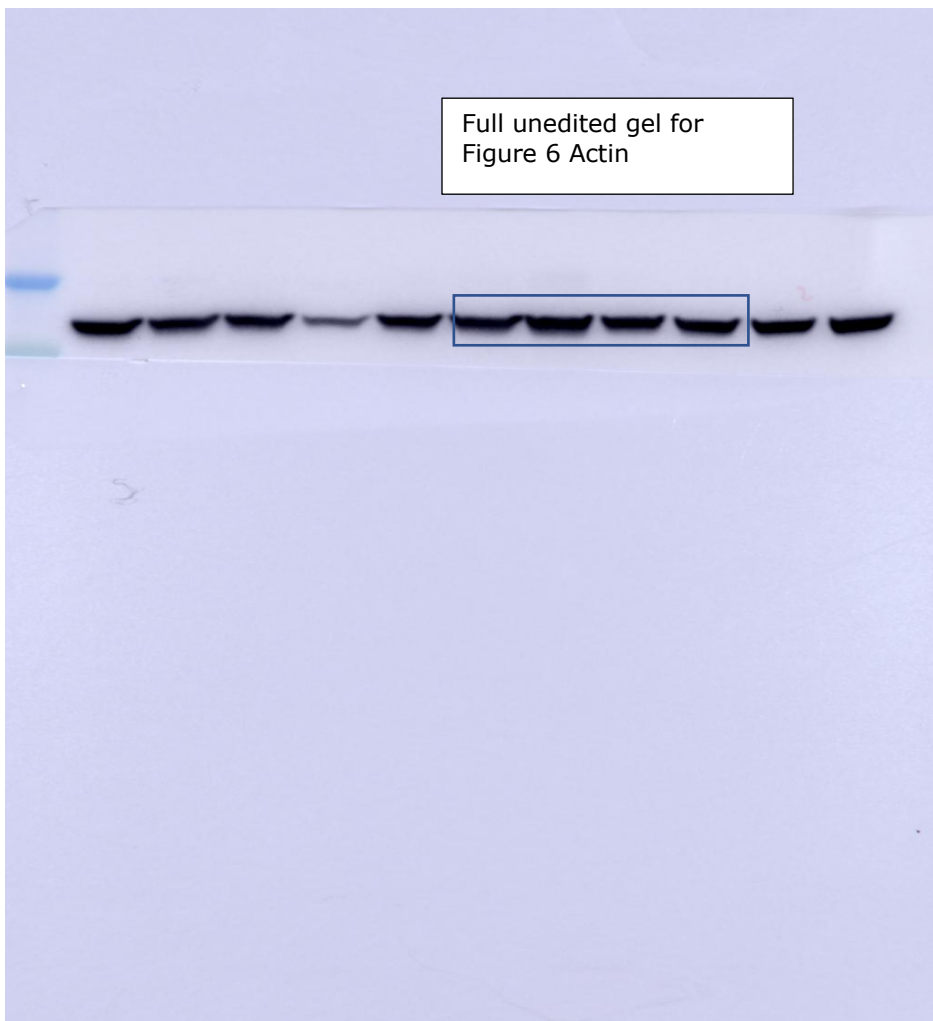

Supplement: mmc1.pdf [file mmc1.pdf]
